# Supplementary material
Source: Springer Nature journal article supplement (https://www.springermedizin.de/resource/supplementary/12913_2012_2732_MOESM3_ESM.pdf/9531192)

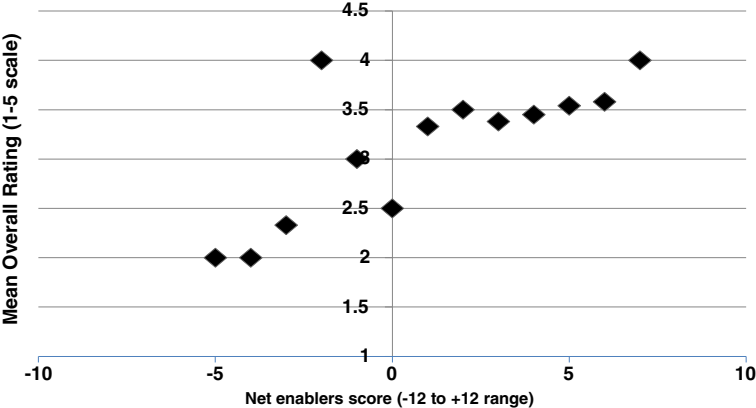

Supplement: MOESM3 [file 9531192]
